# Supplementary material
Source: PubMed Central journal article supplement (PMC3375676)
Supplement: NIHMS380743-supplement-Supporting_Information.pdf [file NIHMS380743-supplement-Supporting_Information.pdf]

**Supporting Information for**

**Bioactive Bromophycolides R-U from the Fijian Red Alga *Callophycus  
serratus***

*An-Shen Lin,<sup>†</sup> E. Paige Stout,<sup>‡</sup> Jacques Prudhomme,<sup>§</sup> Karine Le Roch,<sup>§</sup> Craig R.*

*Fairchild,<sup>⊥</sup> Scott G. Franzblau,<sup>||</sup> William Aalbersberg,<sup>∇</sup> Mark E. Hay,<sup>†</sup> and Julia*

*Kubanek<sup>\*,†,‡</sup>*

<sup>†</sup> School of Biology and <sup>‡</sup>School of Chemistry and Biochemistry, Georgia Institute of  
Technology, Atlanta, Georgia 30332

<sup>§</sup> Department of Cell Biology and Neuroscience, University of California-Riverside,  
Riverside, California 92521

<sup>⊥</sup> Bristol-Myers Squibb Pharmaceutical Research Institute, Princeton, New Jersey 08543

<sup>||</sup> Institute for Tuberculosis Research, College of Pharmacy, University of Illinois at  
Chicago, Chicago, Illinois 60612

<sup>∇</sup> Institute of Applied Sciences, University of the South Pacific, Suva, Fiji

julia.kubanek@biology.gatech.edu.

## Table of Contents

|                                                                                                                        |           |
|------------------------------------------------------------------------------------------------------------------------|-----------|
| <b>Figure S1.</b> $^1\text{H}$ NMR spectrum of bromophycolide R ( <b>1</b> ) (500 MHz; $\text{CDCl}_3$ ).....          | <b>S3</b> |
| <b>Figure S2.</b> $^{13}\text{C}$ NMR spectrum of bromophycolide R ( <b>1</b> ) (125 MHz; $\text{CDCl}_3$ ).....       | <b>S3</b> |
| <b>Figure S3.</b> $^1\text{H}$ NMR spectrum of bromophycolide S ( <b>2</b> ) (500 MHz; $\text{CDCl}_3$ ).....          | <b>S4</b> |
| <b>Figure S4.</b> $^{13}\text{C}$ NMR spectrum of bromophycolide S ( <b>2</b> ) (125 MHz; $\text{CDCl}_3$ ).....       | <b>S4</b> |
| <b>Figure S5.</b> $^1\text{H}$ NMR spectrum of bromophycolide T ( <b>3</b> ) (500 MHz; $\text{CDCl}_3$ ).....          | <b>S5</b> |
| <b>Figure S6.</b> $^{13}\text{C}$ NMR spectrum of bromophycolide T ( <b>3</b> ) (125 MHz; $\text{CDCl}_3$ ).....       | <b>S5</b> |
| <b>Figure S7.</b> $^1\text{H}$ NMR spectrum of bromophycolide U ( <b>4</b> ) (500 MHz; $\text{CDCl}_3$ ).....          | <b>S6</b> |
| <b>Figure S8.</b> $^{13}\text{C}$ NMR spectrum of bromophycolide U ( <b>4</b> ) (125 MHz; $\text{CDCl}_3$ ).....       | <b>S6</b> |
| <b>Table S1:</b> COSY correlations for bromophycolides R-U ( <b>1-4</b> ) .....                                        | <b>S7</b> |
| <b>Table S2:</b> HMBC correlations for bromophycolides R-U ( <b>1-4</b> ) .....                                        | <b>S8</b> |
| <b>Table S3:</b> Observed NOEs from ROESY NMR experiment for bromophycolides R ( <b>1</b> )<br>and T ( <b>3</b> )..... | <b>S9</b> |

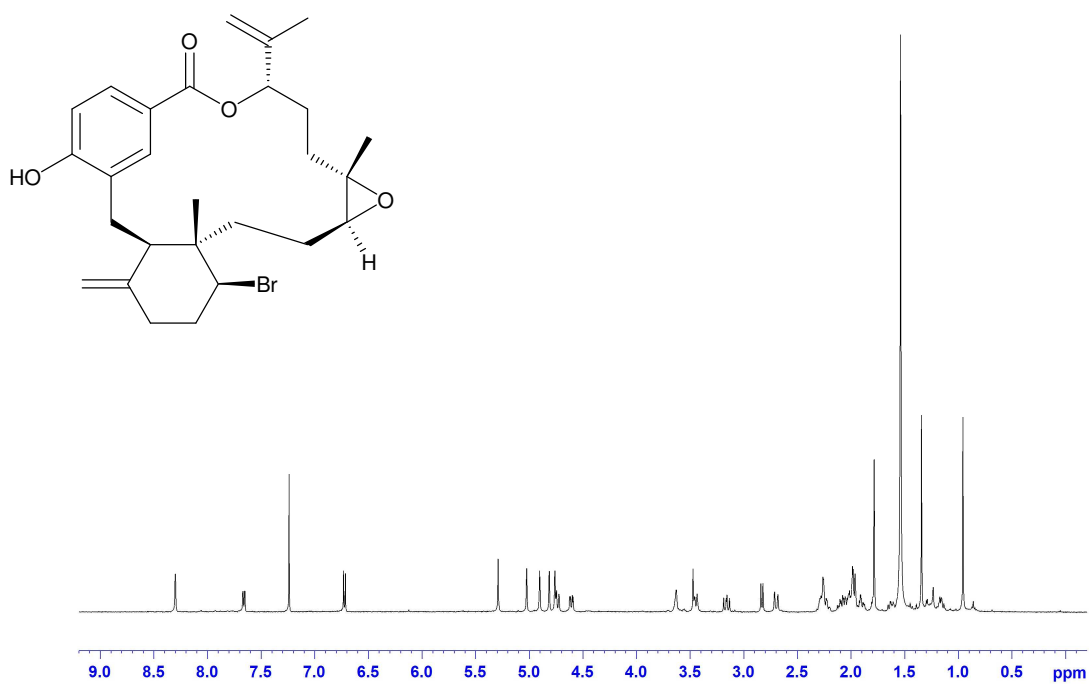

**Figure S1.** <sup>1</sup>H NMR spectrum of bromophycolide R (**1**) (500 MHz; CDCl<sub>3</sub>)

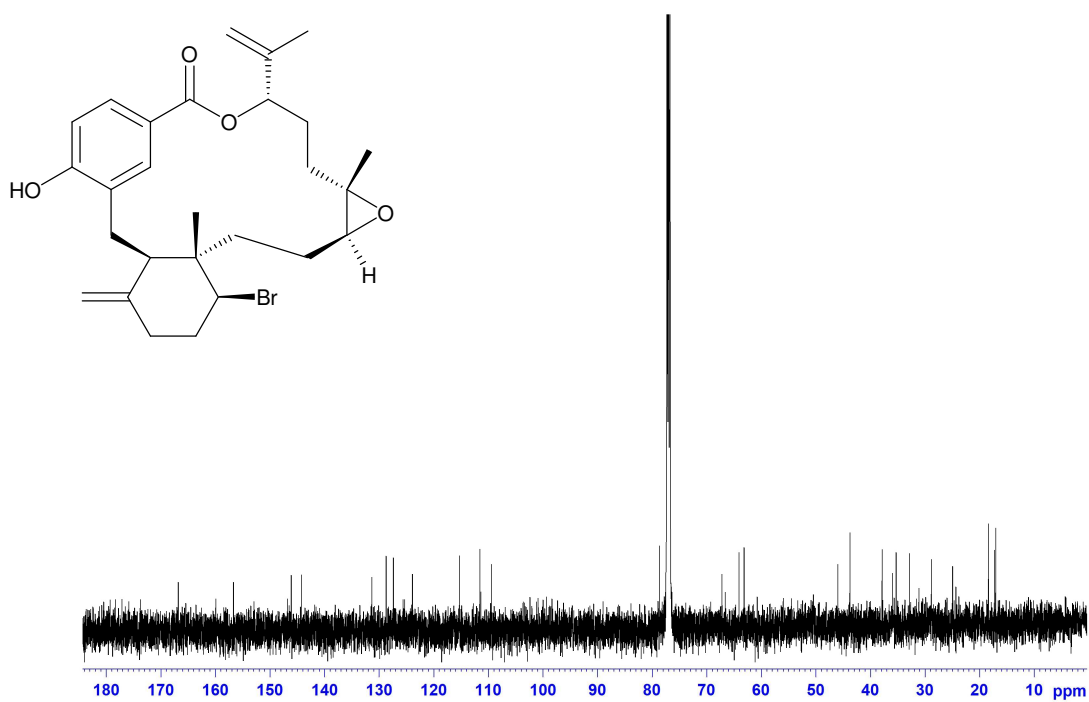

**Figure S2.** <sup>13</sup>C NMR spectrum of bromophycolide R (**1**) (125 MHz; CDCl<sub>3</sub>)

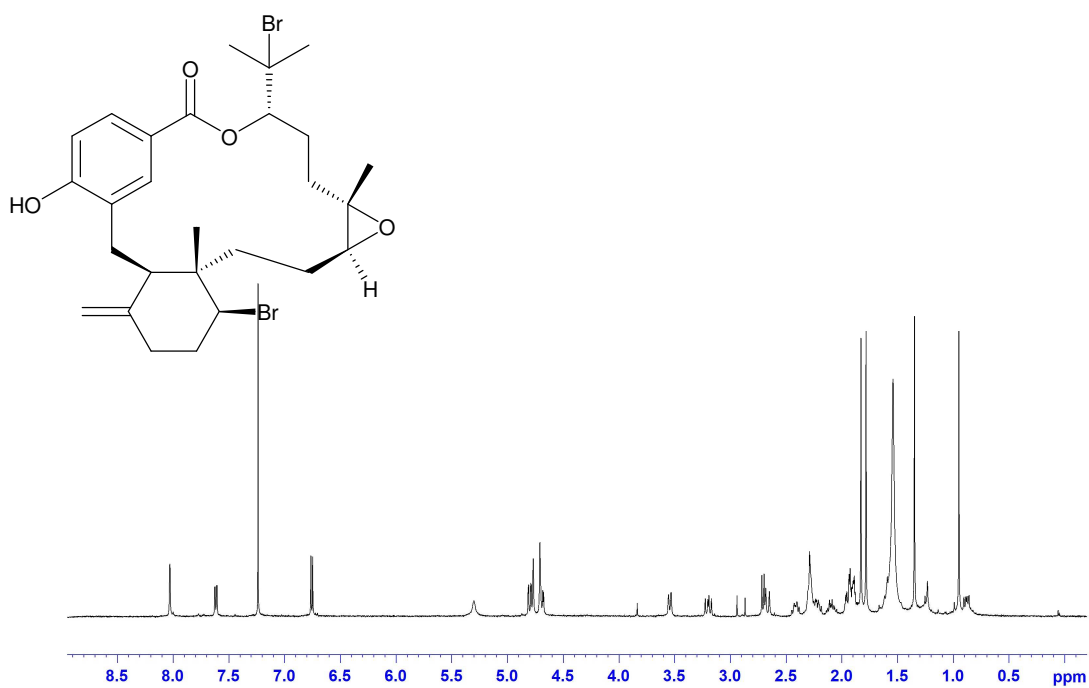

**Figure S3.** <sup>1</sup>H NMR spectrum of bromophycolide S (**2**) (500 MHz; CDCl<sub>3</sub>)

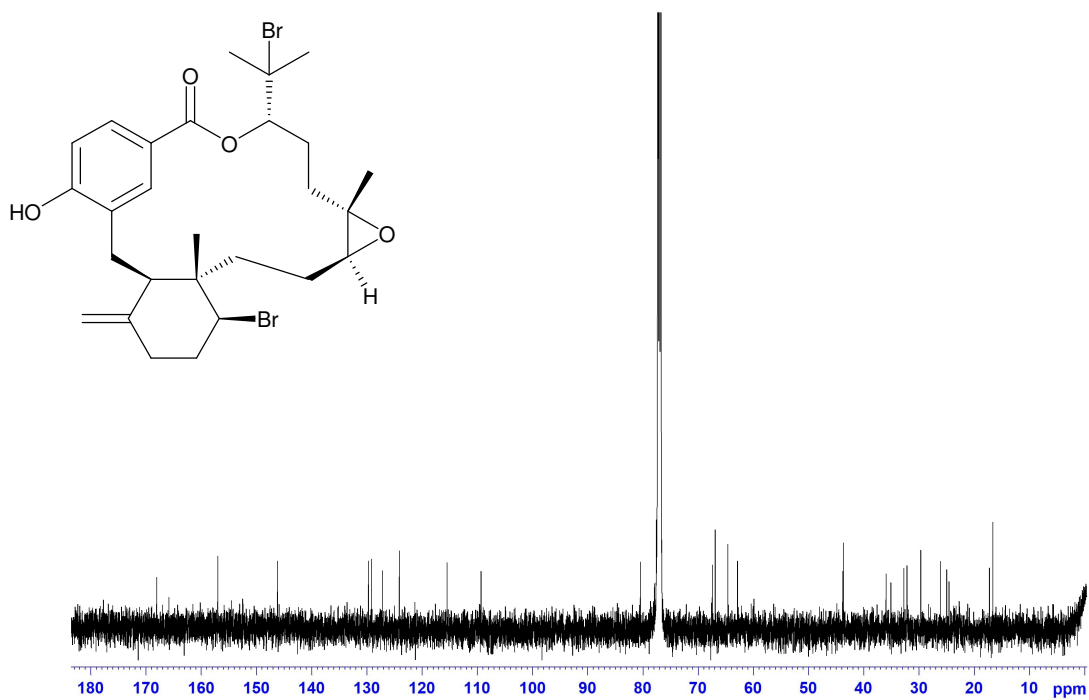

**Figure S4.** <sup>13</sup>C NMR spectrum of bromophycolide S (**2**) (125 MHz; CDCl<sub>3</sub>)

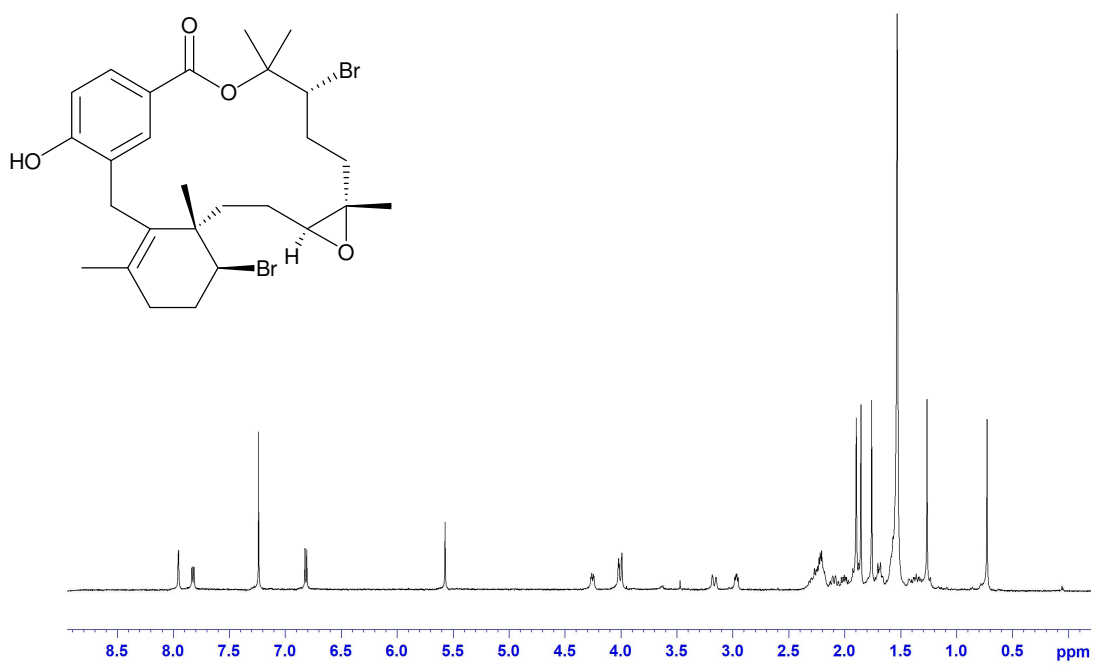

**Figure S5.** <sup>1</sup>H NMR spectrum of bromophycolide T (**3**) (500 MHz; CDCl<sub>3</sub>)

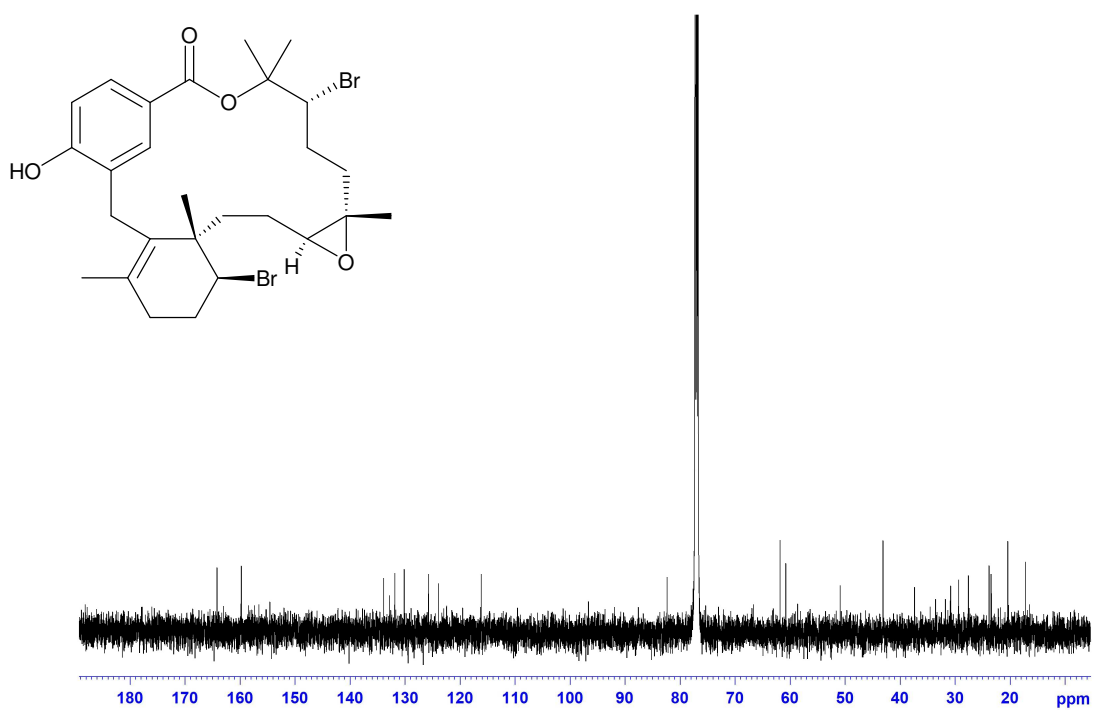

**Figure S6.** <sup>13</sup>C NMR spectrum of bromophycolide T (**3**) (125 MHz; CDCl<sub>3</sub>)

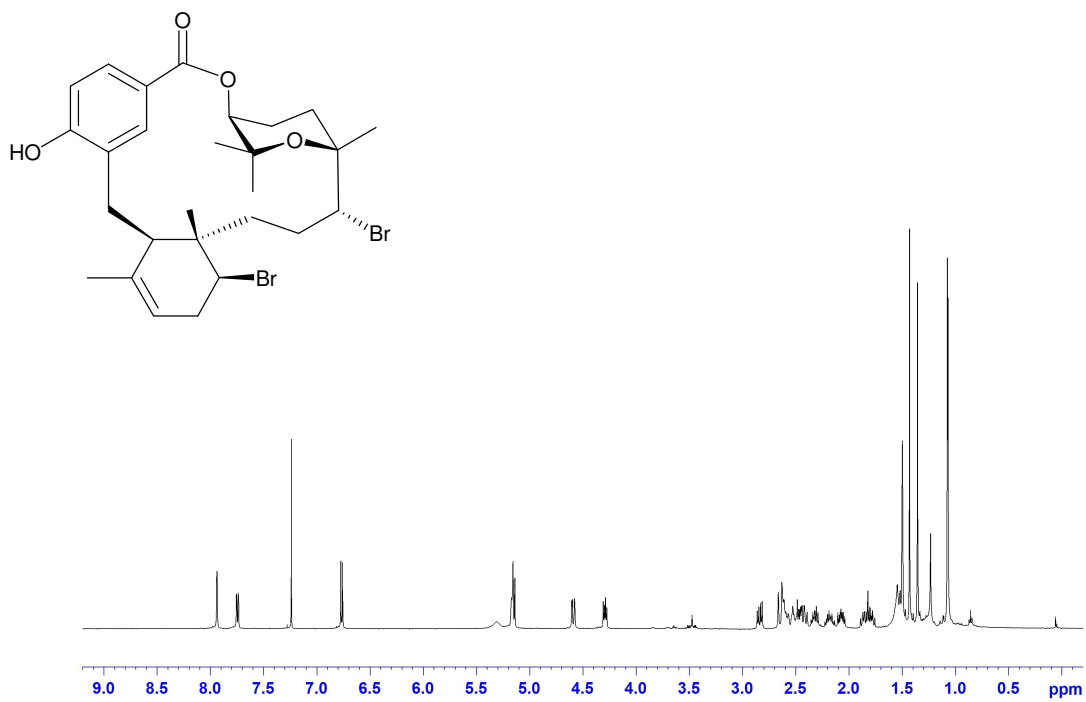

**Figure S7.** <sup>1</sup>H NMR spectrum of bromophycolide U (**4**) (500 MHz; CDCl<sub>3</sub>)

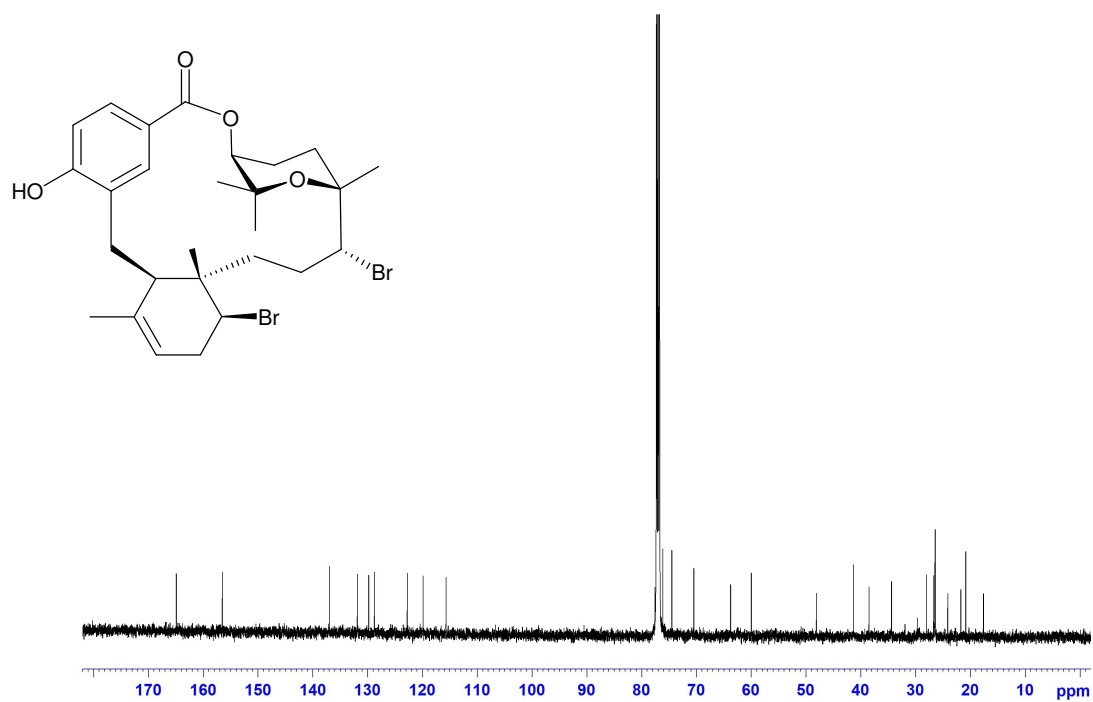

**Figure S8.** <sup>13</sup>C NMR spectrum of bromophycolide U (**4**) (125 MHz; CDCl<sub>3</sub>)

**Table S1:** COSY correlations for bromophycolides R-U (1-4). For diastereotopic protons with dissimilar chemical shifts, the proton whose chemical shift is listed first in Table 1 of the main article is termed “a” and the other is “b”. “NA” (not applicable) indicates that no proton signal exists for that position.

| COSY correlations observed between protons listed on far left and those below: |                      |                      |                      |                      |
|--------------------------------------------------------------------------------|----------------------|----------------------|----------------------|----------------------|
| #                                                                              | bromophycolide R (1) | bromophycolide S (2) | bromophycolide T (3) | bromophycolide U (4) |
| 3                                                                              | -                    | 16                   | 16                   | 16                   |
| 5a                                                                             | 5b                   | 5b, 6                | 5b                   | 5b, 6                |
| 5b                                                                             | 5a, 6                | 5a                   | 5a                   | 5a                   |
| 6                                                                              | 5b                   | 5a                   | NA                   | 5a                   |
| 8a                                                                             | 8b, 9a               | 8b, 9a, 9b           | 8b, 9a, 9b           | 8b, 9a               |
| 8b                                                                             | 8a                   | 8a, 9a, 9b           | 8a, 9a,              | 8a, 9b               |
| 9a                                                                             | 8a, 9b, 10           | 8a, 8b, 9b, 10       | 8a, 8b, 9b, 10       | 8a, 8b, 9b, 10       |
| 9b                                                                             | 9a                   | 8a, 8b, 9a           | 8a, 8b, 9a, 10       | 8a, 8b, 9a, 10       |
| 10                                                                             | 9a                   | 9a                   | 8a, 8b, 9a, 9b, 10   | 8a, 8b, 9a, 9b, 10   |
| 12a                                                                            | 12b, 13a, 13b        | 12b, 13b             | 12b, 13b             | 12b, 13a, 13b        |
| 12b                                                                            | 12a, 13a             | 12a, 13a, 13b        | 12a, 13a, 13b        | 12a, 13a, 13b        |
| 13a                                                                            | 12a, 12b, 13b        | 12b, 13b, 14         | 12b, 13b, 14         | 12a, 12b, 13b, 14    |
| 13b                                                                            | 12a, 13a, 14         | 12a, 12b, 13a, 14    | 12a, 12b, 13a        | 12a, 12b, 13a, 14    |
| 14                                                                             | 13b                  | 13a, 13b             | 13a                  | 13a, 13b             |
| 16                                                                             | 17                   | 3, 17                | 3, 17                | 3, 17                |
| 17                                                                             | 16                   | 16                   | 16                   | 16                   |
| 20a                                                                            | 20b, 21a, 21b        | 20b, 21a, 21b        | 20b, 21a, 21b        | 21a, 21b             |
| 20b                                                                            | 20a, 21a, 21b        | 20a, 21a, 21b        | 20a, 21a, 21b        | NA                   |
| 21a                                                                            | 20a, 20b, 21b, 22    | 20a, 20b, 21b, 22    | 20a, 20b, 21b, 22    | 20, 21b, 22          |
| 21b                                                                            | 20a, 20b, 21a, 22    | 20a, 20b, 21a, 22    | 20a, 20b, 21a, 22    | 20, 21a, 22          |
| 22                                                                             | 21a, 21b             | 21a, 21b             | 21a, 21b             | 21a, 21b             |
| 23a                                                                            | -                    | 6                    | -                    | 6                    |
| 23b                                                                            | -                    | 6                    | NA                   | NA                   |
| 24                                                                             | -                    | -                    | -                    | -                    |
| 25                                                                             | -                    | -                    | -                    | -                    |
| 26a                                                                            | -                    | -                    | -                    | -                    |
| 26b                                                                            | -                    | NA                   | NA                   | NA                   |
| 27                                                                             | -                    | -                    | -                    | -                    |

**Table S2:** HMBC correlations for bromophycolides R-U (1-4). For diastereotopic protons with dissimilar chemical shifts, the proton whose chemical shift is listed first in Table 1 of the main article is termed “a” and the other is “b”. “NA” (not applicable) indicates that no proton signal exists for that position.

| HMBC correlations observed between protons listed on far left and those below: |                      |                      |                      |                      |
|--------------------------------------------------------------------------------|----------------------|----------------------|----------------------|----------------------|
| #                                                                              | bromophycolide R (1) | bromophycolide S (2) | bromophycolide T (3) | bromophycolide U (4) |
| 3                                                                              | 16, 18               | 1, 16, 18            | 1, 5, 16, 18         | 1, 5, 16, 18         |
| 5a                                                                             | -                    | 6, 18, 19            | 4, 6                 | 3, 4, 6, 7, 18, 19   |
| 5b                                                                             | -                    | 6                    | 3, 4, 6, 18, 19      | 3, 4, 6, 18, 19      |
| 6                                                                              | -                    | -                    | NA                   | -                    |
| 8a                                                                             | -                    | -                    | -                    | -                    |
| 8b                                                                             | -                    | -                    | 7, 9, 24             | 6, 7, 9, 24          |
| 9a                                                                             | -                    | -                    | 10                   | 10                   |
| 9b                                                                             | -                    | -                    | 10                   | 8                    |
| 10                                                                             | 9                    | 9                    | -                    | 9, 11                |
| 12a                                                                            | -                    | 11                   | 10                   | 10, 11, 13, 25       |
| 12b                                                                            | -                    | -                    | 10                   | 11, 13, 14           |
| 13a                                                                            | -                    | -                    | -                    | 12, 14, 15           |
| 13b                                                                            | -                    | -                    | -                    | 11, 12               |
| 14                                                                             | -                    | -                    | -                    | 1, 12, 13, 15        |
| 16                                                                             | -                    | 3, 18                | 1, 3, 18             | 1, 3, 18             |
| 17                                                                             | 2, 4                 | 2, 4, 18             | 2, 4, 18             | 2, 4, 18             |
| 20a                                                                            | -                    | -                    | 19                   | -                    |
| 20b                                                                            | -                    | -                    | -                    | NA                   |
| 21a                                                                            | -                    | -                    | -                    | -                    |
| 21b                                                                            | -                    | -                    | -                    | -                    |
| 22                                                                             | -                    | -                    | -                    | 6, 7, 21, 24         |
| 23a                                                                            | 6, 20                | 6, 20                | 6, 19, 20            | 6, 19, 20            |
| 23b                                                                            | 6, 20                | NA                   | NA                   | NA                   |
| 24                                                                             | 6, 7, 8, 22          | 6, 7, 8, 22          | 6, 7, 8, 22          | 6, 7, 8, 22          |
| 25                                                                             | 10, 11, 12           | 10, 11, 12           | 10, 12               | 10, 11, 12           |
| 26a                                                                            | 14, 27               | 14, 15, 27           | 14, 15, 27           | 14, 15, 27           |
| 26b                                                                            | 14, 27               | NA                   | NA                   | NA                   |
| 27                                                                             | 14, 15, 26           | 14, 15, 26           | 14, 15, 26           | 14, 15, 26           |
| OH                                                                             | 18                   | -                    | 4, 17                | -                    |



**Table S3:** Observed NOEs from ROESY NMR experiment for bromophycolides R (**1**) and T (**3**). For diastereotopic protons with dissimilar chemical shifts, the proton whose chemical shift is listed first in Table 1 of the main article is termed “a” and the other is “b”. “NA” (not applicable) indicates that no proton signal exists for that position.

| NOE correlations observed between protons listed on far left and those below: |                               |                               |
|-------------------------------------------------------------------------------|-------------------------------|-------------------------------|
| #                                                                             | bromophycolide R ( <b>1</b> ) | bromophycolide T ( <b>3</b> ) |
| 3                                                                             | 6, 10                         | 5a, 12b, 13a                  |
| 5a                                                                            | 5b, 6, 24                     | 9b, 23                        |
| 5b                                                                            | 5a, 6, 23b, 24                | 20a, 20b, 23                  |
| 6                                                                             | 3, 5a, 5b, 10, 22             | NA                            |
| 8a                                                                            | 9a, 24                        | 8b, 9a, 9b, 24, 25            |
| 8b                                                                            | 12a, 24                       | 8a, 9a, 9b, 10                |
| 9a                                                                            | 8a, 9b, 13b, 22, 24, 25       | 8a, 8b, 9b, 10, 22            |
| 9b                                                                            | 9a, 10, 25                    | 5a, 8a, 8b, 9a, 10, 24, 25    |
| 10                                                                            | 3, 6, 9b, 12a, 12b            | 8b, 9a, 9b, 12a               |
| 12a                                                                           | 10, 13a, 13b                  | 10, 12b, 13a, 13b, 25         |
| 12b                                                                           | 10, 14                        | 12a, 13a, 13b, 25             |
| 13a                                                                           | 12a, 12b, 13b, 25             | 12a, 12b, 13b                 |
| 13b                                                                           | 12a, 12b, 13a, 14, 25         | 12a, 12b, 13a, 14, 25         |
| 14                                                                            | 12b, 13b                      | 13b, 26, 27                   |
| 16                                                                            | 17                            | 17                            |
| 17                                                                            | 16, OH                        | 16, OH                        |
| 20a                                                                           | 20b, 21a, 21b, 23a,           | 20b, 21a, 21b, 23             |
| 20b                                                                           | 20a, 21b                      | 20a, 21a, 21b, 23             |
| 21a                                                                           | 20b, 21b, 22                  | 20a, 20b, 21b                 |
| 21b                                                                           | 20a, 20b, 21a, 22             | 20a, 20b, 21a, 22             |
| 22                                                                            | 6, 9a, 21a, 21b               | 8a, 9a, 9b, 21a, 21b          |
| 23a                                                                           | 20a                           | 5a, 20a, 20b,                 |
| 23b                                                                           | 5b                            | NA                            |
| 24                                                                            | 5a, 5b, 8a, 8b, 9a            | 8a, 8b, 9b                    |
| 25                                                                            | 9a, 9b, 13a, 13b              | 8a, 9b, 12a, 12b, 13b         |
| 26a                                                                           | 27                            | 14, 27                        |
| 26b                                                                           |                               | NA                            |
| 27                                                                            | 26a                           | 14, 26                        |
| OH                                                                            | 17                            | 17                            |
